# Supplementary material for: Single-contig bacterial genomes recovered from cattle fecal metagenomes at farms with variable antibiotic use
Source: Research Square preprint supplement (doi:10.21203/rs.3.rs-9715194/v1), 2026-06-05
Supplement: Supplementary file 1 [file 58e1a62cb491c3729a9c15c5.xlsx]

## Sheet: List1
Supplementary Table 1. Overview of 84 single-contig metagenome-assembled genomes (MAGs) from cattle feces. See the main text for further information.
MAG ID	NCBI BioSample	NCBI BioProject	NCBI Accession	BioSample Name	Farm of origin	Farm type	On-farm antibiotic use (g per six months)	Organism (NCBI taxonomy)	NCBI Tax ID	GTDB R10-RS226 taxonomy	MAG quality	Assembly length (bp)	Completeness (%)	Contamination (%)	GC (%)	5S (count)	16S (count)	23S (count)	Unique tRNAs types	Antibiotic resistance genes (count)	Antibiotic resistance genes
F01_MAG_10	SAMN57225973	PRJNA1041350	JBXSDF000000000	Farm_01_MAG_10	Farm_01	dairy	11179	Janibacter sp.	1870928	d__Bacteria;p__Actinomycetota;c__Actinomycetes;o__Actinomycetales;f__Dermatophilaceae;g__Janibacter;s__	Medium-quality MAG	2992614	75.89	0.05	71.62	2	2	2	26	0
F01_MAG_16	SAMN57225974	PRJNA1041350	JBXSDE000000000	Farm_01_MAG_16	Farm_01	dairy	11179	Dietzia aerolata	595984	d__Bacteria;p__Actinomycetota;c__Actinomycetes;o__Mycobacteriales;f__Mycobacteriaceae;g__Dietzia;s__Dietzia aerolata	Medium-quality MAG	2387018	52.96	0.1	69.06	3	3	3	21	0
F01_MAG_20	SAMN57225975	PRJNA1041350	JBXSDD000000000	Farm_01_MAG_20	Farm_01	dairy	11179	Stutzerimonas sp.	2901166	d__Bacteria;p__Pseudomonadota;c__Gammaproteobacteria;o__Pseudomonadales;f__Pseudomonadaceae;g__Stutzerimonas;s__Stutzerimonas sp025966695	Medium-quality MAG	4169249	70.99	2.27	63.53	4	4	4	26	0
F01_MAG_36	SAMN57225976	PRJNA1041350	JBXSDC000000000	Farm_01_MAG_36	Farm_01	dairy	11179	Corynebacterium sp.	1720	d__Bacteria;p__Actinomycetota;c__Actinomycetes;o__Mycobacteriales;f__Mycobacteriaceae;g__Corynebacterium;s__Corynebacterium sp012837295	Medium-quality MAG	2743005	80.75	0.08	69.78	4	4	4	24	0
F01_MAG_39	SAMN57225977	PRJNA1041350	JBXSDB000000000	Farm_01_MAG_39	Farm_01	dairy	11179	Stenotrophomonas koreensis	266128	d__Bacteria;p__Pseudomonadota;c__Gammaproteobacteria;o__Xanthomonadales;f__Xanthomonadaceae;g__Stenotrophomonas;s__Stenotrophomonas koreensis	Medium-quality MAG	3021813	82.5	1.35	66.65	7	6	6	24	0
F01_MAG_4	SAMN57225978	PRJNA1041350	JBXSDA000000000	Farm_01_MAG_4	Farm_01	dairy	11179	Ornithinimicrobium humiphilum	125288	d__Bacteria;p__Actinomycetota;c__Actinomycetes;o__Actinomycetales;f__Dermatophilaceae;g__Ornithinimicrobium;s__Ornithinimicrobium humiphilum	Medium-quality MAG	3259708	79.35	0.12	73.16	3	3	3	25	0
F01_MAG_48	SAMN57225979	PRJNA1041350	JBXSCZ000000000	Farm_01_MAG_48	Farm_01	dairy	11179	Arachnia sp.	2801846	d__Bacteria;p__Actinomycetota;c__Actinomycetes;o__Propionibacteriales;f__Propionibacteriaceae;g__Arachnia;s__Arachnia sp012837465	High-quality MAG	2937379	98.43	2.34	68.68	1	1	1	24	0
F01_MAG_5	SAMN57225980	PRJNA1041350	JBXSCY000000000	Farm_01_MAG_5	Farm_01	dairy	11179	Rhodococcus rhodochrous	1829	d__Bacteria;p__Actinomycetota;c__Actinomycetes;o__Mycobacteriales;f__Mycobacteriaceae;g__Rhodococcus;s__Rhodococcus rhodochrous	Medium-quality MAG	3679354	59.12	0.04	68.39	3	3	3	20	0
F01_MAG_59	SAMN57225981	PRJNA1041350	JBXSCX000000000	Farm_01_MAG_59	Farm_01	dairy	11179	Ornithinicoccus sp.	2024428	d__Bacteria;p__Actinomycetota;c__Actinomycetes;o__Actinomycetales;f__Dermatophilaceae;g__Ornithinicoccus;s__	High-quality MAG	3889378	99.33	0.5	71.52	2	2	2	26	0
F01_MAG_69	SAMN57225982	PRJNA1041350	JBXSCW000000000	Farm_01_MAG_69	Farm_01	dairy	11179	Gammaproteobacteria bacterium	1913989	d__Bacteria;p__Pseudomonadota;c__Gammaproteobacteria;o__JAQSXL01;f__JAQSXL01;g__JAQSXL01;s__	High-quality MAG	1413162	100	0.01	41.54	2	2	2	24	0
F01_MAG_71	SAMN57225983	PRJNA1041350	JBXSCV000000000	Farm_01_MAG_71	Farm_01	dairy	11179	Cyclobacteriaceae bacterium	2099675	d__Bacteria;p__Bacteroidota;c__Bacteroidia;o__Cytophagales;f__Cyclobacteriaceae;g__DATGMS01;s__DATGMS01 sp035303945	High-quality MAG	4366152	100	0.04	44.29	3	3	3	24	0
F01_MAG_72	SAMN57225984	PRJNA1041350	JBXSCU000000000	Farm_01_MAG_72	Farm_01	dairy	11179	Yanghanlia sp.	3156473	d__Bacteria;p__Pseudomonadota;c__Gammaproteobacteria;o__Burkholderiales;f__Burkholderiaceae;g__Yanghanlia;s__Yanghanlia sp023437255	Medium-quality MAG	2892155	76.89	0.5	62.7	3	3	3	25	0
F01_MAG_73	SAMN57225985	PRJNA1041350	JBXSCT000000000	Farm_01_MAG_73	Farm_01	dairy	11179	Moheibacter sp.	1965316	d__Bacteria;p__Bacteroidota;c__Bacteroidia;o__Flavobacteriales;f__Weeksellaceae;g__Moheibacter;s__	High-quality MAG	2403803	98.88	0.48	37.61	3	3	3	24	1	lnu(H)
F01_MAG_75	SAMN57225986	PRJNA1041350	JBXSCS000000000	Farm_01_MAG_75	Farm_01	dairy	11179	Arachnia sp.	2801846	d__Bacteria;p__Actinomycetota;c__Actinomycetes;o__Propionibacteriales;f__Propionibacteriaceae;g__Arachnia;s__	Medium-quality MAG	3149748	73.38	0.15	69.57	2	2	2	24	0
F01_MAG_80	SAMN57225987	PRJNA1041350	JBXSCR000000000	Farm_01_MAG_80	Farm_01	dairy	11179	Glutamicibacter sp.	1931995	d__Bacteria;p__Actinomycetota;c__Actinomycetes;o__Actinomycetales;f__Micrococcaceae;g__Glutamicibacter;s__	Medium-quality MAG	1878343	51.78	0.01	63.16	0	0	0	14	0
F01_MAG_82	SAMN57225988	PRJNA1041350	JBXSCQ000000000	Farm_01_MAG_82	Farm_01	dairy	11179	Leucobacter sp.	1898440	d__Bacteria;p__Actinomycetota;c__Actinomycetes;o__Actinomycetales;f__Microbacteriaceae;g__Leucobacter;s__	Medium-quality MAG	2004562	74.99	0.61	61.52	2	2	2	24	0
F01_MAG_86	SAMN57225989	PRJNA1041350	JBXSCP000000000	Farm_01_MAG_86	Farm_01	dairy	11179	Rhodococcus yananensis	2879464	d__Bacteria;p__Actinomycetota;c__Actinomycetes;o__Mycobacteriales;f__Mycobacteriaceae;g__Rhodococcus;s__Rhodococcus yananensis	Medium-quality MAG	4255399	83.95	0.23	68.65	4	4	4	24	0
F02_MAG_4	SAMN57225990	PRJNA1041350	JBXSCO000000000	Farm_02_MAG_4	Farm_02	beef	0	Klebsiella grimontii	2058152	d__Bacteria;p__Pseudomonadota;c__Gammaproteobacteria;o__Enterobacterales;f__Enterobacteriaceae;g__Klebsiella;s__Klebsiella grimontii	High-quality MAG	5810237	100	0.17	55.76	9	8	8	26	4	blaOXY-6-1, fosA_gen, oqxA10, oqxB20
F03_MAG_22	SAMN57225991	PRJNA1041350	JBXSCN000000000	Farm_03_MAG_22	Farm_03	dairy	35	Candidatus Saccharimonadales bacterium	2973664	d__Bacteria;p__Patescibacteriota;c__Saccharimonadia;o__Saccharimonadales;f__;g__;s__	High-quality MAG	832019	95.45	0	47.38	1	1	1	25	0
F03_MAG_26	SAMN57225992	PRJNA1041350	JBXSCM000000000	Farm_03_MAG_26	Farm_03	dairy	35	Taishania sp.	2849662	d__Bacteria;p__Bacteroidota;c__Bacteroidia;o__Flavobacteriales;f__Crocinitomicaceae;g__Taishania;s__	Medium-quality MAG	2504048	73.93	0.06	36.49	5	5	5	20	1	tet(X2)
F04_MAG_1	SAMN57225993	PRJNA1041350	JBXSCL000000000	Farm_04_MAG_1	Farm_04	beef	0	Escherichia coli	562	d__Bacteria;p__Pseudomonadota;c__Gammaproteobacteria;o__Enterobacterales;f__Enterobacteriaceae;g__Escherichia;s__Escherichia coli	High-quality MAG	5246135	100	0.1	50.69	8	7	7	26	5	aph(3'')-Ib, aph(6)-Id, blaEC-18, sul2, tet(B)
F04_MAG_14	SAMN57225994	PRJNA1041350	JBXSCK000000000	Farm_04_MAG_14	Farm_04	beef	0	Solibacillus silvestris	76853	d__Bacteria;p__Bacillota;c__Bacilli;o__Bacillales_A;f__Planococcaceae;g__Solibacillus;s__Solibacillus silvestris	High-quality MAG	3806390	99.99	0.75	38.91	12	12	12	25	0
F04_MAG_18	SAMN57225995	PRJNA1041350	JBXSCJ000000000	Farm_04_MAG_18	Farm_04	beef	0	Streptomyces albidoflavus	1886	d__Bacteria;p__Actinomycetota;c__Actinomycetes;o__Streptomycetales;f__Streptomycetaceae;g__Streptomyces;s__Streptomyces albidoflavus	Medium-quality MAG	5591992	77.66	0.36	73.55	6	6	6	25	3	aacA-STR-13, bla2a, catA5
F04_MAG_2	SAMN57225996	PRJNA1041350	JBXSCI000000000	Farm_04_MAG_2	Farm_04	beef	0	Arthrobacter citreus	1670	d__Bacteria;p__Actinomycetota;c__Actinomycetes;o__Actinomycetales;f__Micrococcaceae;g__Arthrobacter_B;s__Arthrobacter_B citreus	Medium-quality MAG	1614672	60.65	0.08	65.84	2	2	2	16	0
F04_MAG_7	SAMN57225997	PRJNA1041350	JBXSCH000000000	Farm_04_MAG_7	Farm_04	beef	0	Sphingomonas sp.	28214	d__Bacteria;p__Pseudomonadota;c__Alphaproteobacteria;o__Sphingomonadales;f__Sphingomonadaceae;g__Sphingomonas;s__Sphingomonas sp029239295	High-quality MAG	2943365	99.99	0.04	65.52	3	3	3	24	0
F04_MAG_9	SAMN57225998	PRJNA1041350	JBXSCG000000000	Farm_04_MAG_9	Farm_04	beef	0	Luteimonas chenhongjianii	2006110	d__Bacteria;p__Pseudomonadota;c__Gammaproteobacteria;o__Xanthomonadales;f__Xanthomonadaceae;g__Luteimonas;s__Luteimonas chenhongjianii	Medium-quality MAG	2283614	71.73	0	68.45	0	0	0	22	0
F05_MAG_1	SAMN57225999	PRJNA1041350	JBXSCF000000000	Farm_05_MAG_1	Farm_05	dairy	256	Glutamicibacter arilaitensis	256701	d__Bacteria;p__Actinomycetota;c__Actinomycetes;o__Actinomycetales;f__Micrococcaceae;g__Glutamicibacter;s__Glutamicibacter arilaitensis	High-quality MAG	3322133	96.44	1.67	59.68	8	7	7	24	0
F05_MAG_10	SAMN57226000	PRJNA1041350	JBXSCE000000000	Farm_05_MAG_10	Farm_05	dairy	256	Timonella sp.	1964192	d__Bacteria;p__Actinomycetota;c__Actinomycetes;o__Actinomycetales;f__Cellulomonadaceae;g__Timonella;s__	High-quality MAG	2937647	98.39	0.19	56.66	8	7	7	24	0
F05_MAG_4	SAMN57226001	PRJNA1041350	JBXSCD000000000	Farm_05_MAG_4	Farm_05	dairy	256	Flavobacterium sp.	239	d__Bacteria;p__Bacteroidota;c__Bacteroidia;o__Flavobacteriales;f__Flavobacteriaceae;g__Flavobacterium;s__	Medium-quality MAG	2159183	89.68	1.15	38.38	6	6	6	24	1	lnu(H)
F05_MAG_5	SAMN57226002	PRJNA1041350	JBXSCC000000000	Farm_05_MAG_5	Farm_05	dairy	256	Candidatus Kurthia intestinigallinarum	1562256	d__Bacteria;p__Bacillota;c__Bacilli;o__Bacillales_A;f__Planococcaceae;g__Kurthia;s__Kurthia intestinigallinarum	Medium-quality MAG	2380688	83.99	0	39.78	12	11	12	25	0
F06_MAG_4	SAMN57226003	PRJNA1041350	JBXSCB000000000	Farm_06_MAG_4	Farm_06	combined	3710	Avrilella dinanensis	2008672	d__Bacteria;p__Bacteroidota;c__Bacteroidia;o__Flavobacteriales;f__Flavobacteriaceae;g__Flavobacterium;s__Flavobacterium dinanensis	High-quality MAG	2297119	96.78	1.32	37.85	4	4	4	24	2	dfrA45, lnu(H)
F07_MAG_12	SAMN57226004	PRJNA1041350	JBXSCA000000000	Farm_07_MAG_12	Farm_07	dairy	51	Moheibacter sp.	1965316	d__Bacteria;p__Bacteroidota;c__Bacteroidia;o__Flavobacteriales;f__Weeksellaceae;g__Moheibacter;s__	Medium-quality MAG	1694599	70.23	0.16	38.87	1	1	1	22	0
F07_MAG_14	SAMN57226005	PRJNA1041350	JBXSBZ000000000	Farm_07_MAG_14	Farm_07	dairy	51	Chryseobacterium sp.	1871047	d__Bacteria;p__Bacteroidota;c__Bacteroidia;o__Flavobacteriales;f__Weeksellaceae;g__Planobacterium_A;s__Planobacterium_A sp023387375	High-quality MAG	1974679	93.12	0.08	39.84	2	2	2	23	1	lnu(H)
F07_MAG_19	SAMN57226006	PRJNA1041350	JBXSBY000000000	Farm_07_MAG_19	Farm_07	dairy	51	Enterococcus saccharolyticus	41997	d__Bacteria;p__Bacillota;c__Bacilli;o__Lactobacillales;f__Enterococcaceae;g__Enterococcus_F;s__Enterococcus_F saccharolyticus	High-quality MAG	2597352	100	0.13	37.07	8	8	8	24	0
F07_MAG_2	SAMN57226007	PRJNA1041350	JBXSBX000000000	Farm_07_MAG_2	Farm_07	dairy	51	Candidatus Saccharimonadales bacterium	2973664	d__Bacteria;p__Patescibacteriota;c__Saccharimonadia;o__Saccharimonadales;f__;g__;s__	High-quality MAG	811670	96.22	0.06	47.63	1	1	1	24	0
F07_MAG_5	SAMN57226008	PRJNA1041350	JBXSBW000000000	Farm_07_MAG_5	Farm_07	dairy	51	Flavobacterium sp.	239	d__Bacteria;p__Bacteroidota;c__Bacteroidia;o__Flavobacteriales;f__Flavobacteriaceae;g__Flavobacterium;s__	High-quality MAG	2736764	99.96	0.01	32.47	7	7	7	24	0
F08_MAG_10	SAMN57226009	PRJNA1041350	JBXSBV000000000	Farm_08_MAG_10	Farm_08	dairy	448	Stenotrophomonas sp.	69392	d__Bacteria;p__Pseudomonadota;c__Gammaproteobacteria;o__Xanthomonadales;f__Xanthomonadaceae;g__Stenotrophomonas;s__	High-quality MAG	3323278	99.99	0.02	67.27	4	3	3	25	0
F08_MAG_109	SAMN57226010	PRJNA1041350	JBXSBU000000000	Farm_08_MAG_109	Farm_08	dairy	448	Castellaniella sp.	1955812	d__Bacteria;p__Pseudomonadota;c__Gammaproteobacteria;o__Burkholderiales;f__Burkholderiaceae;g__Castellaniella;s__	Medium-quality MAG	1685697	59.05	0	59.78	1	1	1	21	0
F08_MAG_117	SAMN57226011	PRJNA1041350	JBXSBT000000000	Farm_08_MAG_117	Farm_08	dairy	448	Pseudochelatococcus sp.	2020869	d__Bacteria;p__Pseudomonadota;c__Alphaproteobacteria;o__Rhizobiales;f__Beijerinckiaceae;g__Pseudochelatococcus;s__	Medium-quality MAG	1227479	54.43	0	46.67	2	2	2	17	0
F08_MAG_118	SAMN57226012	PRJNA1041350	JBXSBS000000000	Farm_08_MAG_118	Farm_08	dairy	448	Psychrobacter pasteurii	1945520	d__Bacteria;p__Pseudomonadota;c__Gammaproteobacteria;o__Pseudomonadales;f__Moraxellaceae;g__Psychrobacter;s__Psychrobacter pasteurii	Medium-quality MAG	1990166	68.04	0.83	42.86	4	4	4	24	0
F08_MAG_120	SAMN57226013	PRJNA1041350	JBXSBR000000000	Farm_08_MAG_120	Farm_08	dairy	448	Alcaligenes faecalis	511	d__Bacteria;p__Pseudomonadota;c__Gammaproteobacteria;o__Burkholderiales;f__Burkholderiaceae;g__Alcaligenes;s__Alcaligenes faecalis	Medium-quality MAG	2585352	67.12	0.06	57.18	2	2	2	24	1	aph(3')-H48
F08_MAG_22	SAMN57226014	PRJNA1041350	JBXSBQ000000000	Farm_08_MAG_22	Farm_08	dairy	448	Sphingobacterium alimentarium	797292	d__Bacteria;p__Bacteroidota;c__Bacteroidia;o__Sphingobacteriales;f__Sphingobacteriaceae;g__Sphingobacterium;s__Sphingobacterium alimentarium	High-quality MAG	3292435	99.76	0.02	38.83	6	6	6	24	0
F08_MAG_24	SAMN57226015	PRJNA1041350	JBXSBP000000000	Farm_08_MAG_24	Farm_08	dairy	448	Microbacterium ginsengiterrae	546115	d__Bacteria;p__Actinomycetota;c__Actinomycetes;o__Actinomycetales;f__Microbacteriaceae;g__Microbacterium;s__Microbacterium ginsengiterrae	Medium-quality MAG	1650135	55.35	0.04	68.53	1	1	1	19	0
F08_MAG_33	SAMN57226016	PRJNA1041350	JBXSBO000000000	Farm_08_MAG_33	Farm_08	dairy	448	Bacteroidia bacterium	2044936	d__Bacteria;p__Bacteroidota;c__Bacteroidia;o__CAIKAF01;f__CAIKAF01;g__;s__	High-quality MAG	2862349	100	0.08	33.76	3	3	3	24	1	lnu(H)
F08_MAG_42	SAMN57226017	PRJNA1041350	JBXSBN000000000	Farm_08_MAG_42	Farm_08	dairy	448	Luteimonas arsenica	1586242	d__Bacteria;p__Pseudomonadota;c__Gammaproteobacteria;o__Xanthomonadales;f__Xanthomonadaceae;g__Luteimonas;s__Luteimonas arsenica	Medium-quality MAG	1072146	50.37	0.01	70.98	1	1	1	18	0
F08_MAG_44	SAMN57226018	PRJNA1041350	JBXSBM000000000	Farm_08_MAG_44	Farm_08	dairy	448	Parapusillimonas sp.	2067798	d__Bacteria;p__Pseudomonadota;c__Gammaproteobacteria;o__Burkholderiales;f__Burkholderiaceae;g__Parapusillimonas;s__	Medium-quality MAG	2109215	52.36	0.03	61.81	2	2	2	19	0
F08_MAG_45	SAMN57226019	PRJNA1041350	JBXSBL000000000	Farm_08_MAG_45	Farm_08	dairy	448	Glutamicibacter sp.	1931995	d__Bacteria;p__Actinomycetota;c__Actinomycetes;o__Actinomycetales;f__Micrococcaceae;g__Glutamicibacter;s__	Medium-quality MAG	1807911	52.57	0.35	61.96	0	0	0	17	4	aadA9, cmx (2 copies), sul1
F08_MAG_48	SAMN57226020	PRJNA1041350	JBXSBK000000000	Farm_08_MAG_48	Farm_08	dairy	448	Pseudoxanthomonas sp.	1871049	d__Bacteria;p__Pseudomonadota;c__Gammaproteobacteria;o__Xanthomonadales;f__Xanthomonadaceae;g__Pseudoxanthomonas;s__	Medium-quality MAG	2825147	84.81	0.01	70.87	0	0	0	22	0
F08_MAG_61	SAMN57226021	PRJNA1041350	JBXSBJ000000000	Farm_08_MAG_61	Farm_08	dairy	448	Pusillimonas sp.	3040095	d__Bacteria;p__Pseudomonadota;c__Gammaproteobacteria;o__Burkholderiales;f__Burkholderiaceae;g__Pusillimonas;s__	Medium-quality MAG	2409378	74.65	0.13	57.02	2	2	2	22	0
F08_MAG_81	SAMN57226022	PRJNA1041350	JBXSBI000000000	Farm_08_MAG_81	Farm_08	dairy	448	Stenotrophomonas sp.	69392	d__Bacteria;p__Pseudomonadota;c__Gammaproteobacteria;o__Xanthomonadales;f__Xanthomonadaceae;g__Stenotrophomonas;s__	Medium-quality MAG	1632481	69.16	0.11	66.24	0	0	0	22	0
F08_MAG_82	SAMN57226023	PRJNA1041350	JBXSBH000000000	Farm_08_MAG_82	Farm_08	dairy	448	Castellaniella sp.	1955812	d__Bacteria;p__Pseudomonadota;c__Gammaproteobacteria;o__Burkholderiales;f__Burkholderiaceae;g__Castellaniella;s__	High-quality MAG	2825881	99.95	0.27	64	2	2	2	24	0
F10_MAG_13	SAMN57226024	PRJNA1041350	JBXSBG000000000	Farm_10_MAG_13	Farm_10	combined	0	Timonella sp.	1964192	d__Bacteria;p__Actinomycetota;c__Actinomycetes;o__Actinomycetales;f__Cellulomonadaceae;g__Timonella;s__	Medium-quality MAG	1898292	58.68	0.47	55.52	6	5	5	19	0
F11_MAG_13	SAMN57226025	PRJNA1041350	JBXSBF000000000	Farm_11_MAG_13	Farm_11	beef	0	Taishania sp.	2849662	d__Bacteria;p__Bacteroidota;c__Bacteroidia;o__Flavobacteriales;f__Crocinitomicaceae;g__Taishania;s__	Medium-quality MAG	2019913	56.35	0.22	38.12	5	5	5	18	0
F12_MAG_1	SAMN57226026	PRJNA1041350	JBXSBE000000000	Farm_12_MAG_1	Farm_12	beef	0	Taishania sp.	2849662	d__Bacteria;p__Bacteroidota;c__Bacteroidia;o__Flavobacteriales;f__Crocinitomicaceae;g__Taishania;s__	Medium-quality MAG	1535083	51.34	0.44	38.49	0	0	0	20	0
F12_MAG_5	SAMN57226027	PRJNA1041350	JBXSBD000000000	Farm_12_MAG_5	Farm_12	beef	0	Psychrobacter maritimus	256325	d__Bacteria;p__Pseudomonadota;c__Gammaproteobacteria;o__Pseudomonadales;f__Moraxellaceae;g__Psychrobacter;s__Psychrobacter maritimus	Medium-quality MAG	2145312	70.94	2.04	43.69	4	4	4	23	0
F13_MAG_14	SAMN57226028	PRJNA1041350	JBXSDK000000000	Farm_13_MAG_14	Farm_13	dairy	2969	Solibacillus sp.	1909654	d__Bacteria;p__Bacillota;c__Bacilli;o__Bacillales_A;f__Planococcaceae;g__Solibacillus;s__Solibacillus sp037975215	Medium-quality MAG	2052242	54.14	1.55	39.18	1	1	1	20	0
F14_MAG_3	SAMN57226029	PRJNA1041350	JBXSDJ000000000	Farm_14_MAG_3	Farm_14	beef	0	Pantoea agglomerans	549	d__Bacteria;p__Pseudomonadota;c__Gammaproteobacteria;o__Enterobacterales;f__Enterobacteriaceae;g__Pantoea;s__Pantoea agglomerans	High-quality MAG	4018031	99.79	0	55.6	8	7	7	25	1	oqxB11
F15_MAG_11	SAMN57226030	PRJNA1041350	JBXSDI000000000	Farm_15_MAG_11	Farm_15	dairy	278	Faecalibacter sp.	2766736	d__Bacteria;p__Bacteroidota;c__Bacteroidia;o__Flavobacteriales;f__Weeksellaceae;g__Faecalibacter;s__Faecalibacter sp034661295	High-quality MAG	3015134	99.98	0.13	33.46	10	9	9	24	3	aadS, lnu(H), tet(X4)
F15_MAG_13	SAMN57226031	PRJNA1041350	JBXSDH000000000	Farm_15_MAG_13	Farm_15	dairy	278	Stenotrophomonas sp.	69392	d__Bacteria;p__Pseudomonadota;c__Gammaproteobacteria;o__Xanthomonadales;f__Xanthomonadaceae;g__Stenotrophomonas;s__	High-quality MAG	3008854	99.99	0.23	69.48	4	3	3	24	0
F15_MAG_15	SAMN57226032	PRJNA1041350	JBXSDG000000000	Farm_15_MAG_15	Farm_15	dairy	278	Bordetella trematum	123899	d__Bacteria;p__Pseudomonadota;c__Gammaproteobacteria;o__Burkholderiales;f__Burkholderiaceae;g__Bordetella;s__Bordetella trematum	Medium-quality MAG	3866658	76.58	0.13	65.85	2	2	2	24	0
F15_MAG_2	SAMN57226033	PRJNA1041350	JBXSBC000000000	Farm_15_MAG_2	Farm_15	dairy	278	Sphingobacterium sp.	341027	d__Bacteria;p__Bacteroidota;c__Bacteroidia;o__Sphingobacteriales;f__Sphingobacteriaceae;g__Sphingobacterium;s__	High-quality MAG	3210087	99.8	0.09	37.49	6	6	6	24	2	aadS, lnu(I)
F15_MAG_4	SAMN57226034	PRJNA1041350	JBXSBB000000000	Farm_15_MAG_4	Farm_15	dairy	278	Brucella intermedia	94625	d__Bacteria;p__Pseudomonadota;c__Alphaproteobacteria;o__Rhizobiales;f__Rhizobiaceae;g__Brucella;s__Brucella intermedia	Medium-quality MAG	2713325	61.5	0.02	58.06	2	2	2	22	3	ant(9)-Ic, blaOCH-2, cml_Ochro
F15_MAG_7	SAMN57226035	PRJNA1041350	JBXSBA000000000	Farm_15_MAG_7	Farm_15	dairy	278	Ochrobactrum chromiisoli	2993941	d__Bacteria;p__Pseudomonadota;c__Alphaproteobacteria;o__Rhizobiales;f__Rhizobiaceae;g__Brucella;s__Brucella chromiisoli	Medium-quality MAG	2088419	54.07	0.13	53.23	2	2	2	21	0
F16_MAG_24	SAMN57226036	PRJNA1041350	JBXSAZ000000000	Farm_16_MAG_24	Farm_16	dairy	423	Halopseudomonas formosensis	1002526	d__Bacteria;p__Pseudomonadota;c__Gammaproteobacteria;o__Pseudomonadales;f__Pseudomonadaceae;g__Halopseudomonas;s__Halopseudomonas formosensis	High-quality MAG	3104641	99.58	0.28	63.38	4	4	4	24	1	aadA1
F17_MAG_101	SAMN57226037	PRJNA1041350	JBXSAY000000000	Farm_17_MAG_101	Farm_17	dairy	882	Flavimobilis rhizosphaerae	2775421	d__Bacteria;p__Actinomycetota;c__Actinomycetes;o__Actinomycetales;f__Cellulomonadaceae;g__Flavimobilis;s__Flavimobilis rhizosphaerae	Medium-quality MAG	2502463	80.53	0	72.16	3	3	3	22	0
F17_MAG_108	SAMN57226038	PRJNA1041350	JBXSAX000000000	Farm_17_MAG_108	Farm_17	dairy	882	Sphingobacterium humi	1796905	d__Bacteria;p__Bacteroidota;c__Bacteroidia;o__Sphingobacteriales;f__Sphingobacteriaceae;g__Sphingobacterium;s__Sphingobacterium humi	Medium-quality MAG	2134017	51.25	0.26	42.54	1	1	1	14	0
F17_MAG_12	SAMN57226039	PRJNA1041350	JBXSAW000000000	Farm_17_MAG_12	Farm_17	dairy	882	Vaginella sp.	1935185	d__Bacteria;p__Bacteroidota;c__Bacteroidia;o__Flavobacteriales;f__Weeksellaceae;g__Vaginella;s__	Medium-quality MAG	1714823	70.27	0.79	35.37	4	4	4	20	0
F17_MAG_125	SAMN57226040	PRJNA1041350	JBXSAV000000000	Farm_17_MAG_125	Farm_17	dairy	882	Paracoccaceae bacterium	1904441	d__Bacteria;p__Pseudomonadota;c__Alphaproteobacteria;o__Rhodobacterales;f__Rhodobacteraceae;g__JAAKGP01;s__	Medium-quality MAG	2806064	54.6	1.13	67.94	0	0	0	18	0
F17_MAG_14	SAMN57226041	PRJNA1041350	JBXSAU000000000	Farm_17_MAG_14	Farm_17	dairy	882	Bacteroidia bacterium	2044936	d__Bacteria;p__Bacteroidota;c__Bacteroidia;o__CAIKAF01;f__CAIKAF01;g__;s__	Medium-quality MAG	2153094	64.9	0.16	35.01	1	1	1	19	0
F17_MAG_163	SAMN57226042	PRJNA1041350	JBXSAT000000000	Farm_17_MAG_163	Farm_17	dairy	882	Alphaproteobacteria bacterium	1913988	d__Bacteria;p__Pseudomonadota;c__Alphaproteobacteria;o__JAGOMX01;f__JAGOMX01;g__;s__	High-quality MAG	1130813	99.98	0	41.41	1	1	1	23	0
F17_MAG_28	SAMN57226043	PRJNA1041350	JBXSAS000000000	Farm_17_MAG_28	Farm_17	dairy	882	Devosia sp.	1871048	d__Bacteria;p__Pseudomonadota;c__Alphaproteobacteria;o__Rhizobiales;f__Devosiaceae;g__Devosia;s__	Medium-quality MAG	2340689	62.93	0.62	59.94	2	2	2	19	0
F17_MAG_36	SAMN57226044	PRJNA1041350	JBXSAR000000000	Farm_17_MAG_36	Farm_17	dairy	882	Pseudogemmobacter sp.	2663136	d__Bacteria;p__Pseudomonadota;c__Alphaproteobacteria;o__Rhodobacterales;f__Rhodobacteraceae;g__Pseudogemmobacter;s__	Medium-quality MAG	2087194	51.2	1.32	62.87	5	5	5	18	0
F17_MAG_78	SAMN57226045	PRJNA1041350	JBXSAQ000000000	Farm_17_MAG_78	Farm_17	dairy	882	Pseudochrobactrum saccharolyticum	354352	d__Bacteria;p__Pseudomonadota;c__Alphaproteobacteria;o__Rhizobiales;f__Rhizobiaceae;g__Pseudochrobactrum;s__Pseudochrobactrum saccharolyticum	Medium-quality MAG	2650741	79.55	1.76	52.02	1	1	1	24	0
F17_MAG_8	SAMN57226046	PRJNA1041350	JBXSAP000000000	Farm_17_MAG_8	Farm_17	dairy	882	Stenotrophomonas sp.	69392	d__Bacteria;p__Pseudomonadota;c__Gammaproteobacteria;o__Xanthomonadales;f__Xanthomonadaceae;g__Stenotrophomonas;s__	Medium-quality MAG	2162775	70.69	0.07	65.87	1	2	1	23	0
F17_MAG_84	SAMN57226047	PRJNA1041350	JBXSAO000000000	Farm_17_MAG_84	Farm_17	dairy	882	Pusillimonas sp.	3040095	d__Bacteria;p__Pseudomonadota;c__Gammaproteobacteria;o__Burkholderiales;f__Burkholderiaceae;g__Pusillimonas_C;s__Pusillimonas_C sp020687695	Medium-quality MAG	2029543	58.17	0.26	58.35	2	2	2	16	0
F17_MAG_99	SAMN57226048	PRJNA1041350	JBXSAN000000000	Farm_17_MAG_99	Farm_17	dairy	882	Candidatus Saccharimonas sp.	1917697	d__Bacteria;p__Patescibacteriota;c__Saccharimonadia;o__Saccharimonadales;f__Saccharimonadaceae;g__Saccharimonas;s__	High-quality MAG	952532	99.6	0.05	47.65	1	1	1	24	0
F18_MAG_11	SAMN57226049	PRJNA1041350	JBXSAM000000000	Farm_18_MAG_11	Farm_18	beef	0	Flavobacterium sp.	239	d__Bacteria;p__Bacteroidota;c__Bacteroidia;o__Flavobacteriales;f__Flavobacteriaceae;g__Flavobacterium;s__	High-quality MAG	2746166	99.99	0	32.35	7	7	7	24	1	lnu(H)
F18_MAG_2	SAMN57226050	PRJNA1041350	JBXSAL000000000	Farm_18_MAG_2	Farm_18	beef	0	Pradoshia eiseniae	2064768	d__Bacteria;p__Bacillota;c__Bacilli;o__Bacillales_B;f__Pradoshiaceae;g__Pradoshia;s__Pradoshia eiseniae	Medium-quality MAG	1858034	62.84	0.01	43.1	11	10	10	23	0
F18_MAG_27	SAMN57226051	PRJNA1041350	JBXSAK000000000	Farm_18_MAG_27	Farm_18	beef	0	Faecalibacter sp.	2766736	d__Bacteria;p__Bacteroidota;c__Bacteroidia;o__Flavobacteriales;f__Weeksellaceae;g__Faecalibacter;s__	Medium-quality MAG	1383479	51.58	0.14	31.71	2	2	2	15	0
F19_MAG_15	SAMN57226052	PRJNA1041350	JBXSAJ000000000	Farm_19_MAG_15	Farm_19	dairy	559	Candidatus Saccharimonas sp.	1917697	d__Bacteria;p__Patescibacteriota;c__Saccharimonadia;o__Saccharimonadales;f__Saccharimonadaceae;g__Saccharimonas;s__	High-quality MAG	931515	98.42	0.05	47.96	1	1	1	24	0
F19_MAG_7	SAMN57226053	PRJNA1041350	JBXSAI000000000	Farm_19_MAG_7	Farm_19	dairy	559	Chryseobacterium sp.	1871047	d__Bacteria;p__Bacteroidota;c__Bacteroidia;o__Flavobacteriales;f__Weeksellaceae;g__Planobacterium_A;s__Planobacterium_A sp023393915	High-quality MAG	2050511	99.71	0.15	38.99	2	2	2	24	2	aadS, lnu(I)
F27_MAG_6	SAMN57226054	PRJNA1041350	JBXSAH000000000	Farm_27_MAG_6	Farm_27	dairy	5442	Glutamicibacter nicotianae	37929	d__Bacteria;p__Actinomycetota;c__Actinomycetes;o__Actinomycetales;f__Micrococcaceae;g__Glutamicibacter;s__Glutamicibacter nicotianae	Medium-quality MAG	2370500	71.18	0.02	61.89	1	1	1	20	0
F27_MAG_9	SAMN57226055	PRJNA1041350	JBXSAG000000000	Farm_27_MAG_9	Farm_27	dairy	5442	Candidatus Saccharimonadales bacterium	2973664	d__Bacteria;p__Patescibacteriota;c__Saccharimonadia;o__Saccharimonadales;f__;g__;s__	High-quality MAG	817835	96.03	0.04	47.6	1	1	1	24	0
F28_MAG_6	SAMN57226056	PRJNA1041350	JBXSAF000000000	Farm_28_MAG_6	Farm_28	dairy	264	Empedobacter stercoris	1628248	d__Bacteria;p__Bacteroidota;c__Bacteroidia;o__Flavobacteriales;f__Weeksellaceae;g__Empedobacter;s__Empedobacter stercoris	High-quality MAG	2965353	95.3	0.32	32.05	8	7	7	24	4	aadS, blaEBR-5, lnu(H) (2 copies)
